# Supplementary material for: ATTED-II in 2018: A Plant Coexpression Database Based on Investigation of the Statistical Property of the Mutual Rank Index
Source: PubMed Central journal article supplement (PMC5914358; doi:10.1093/pcp/pcx191), 2017-12-04
Supplement: pcx191_pcp-2017-e-00441-file004.pdf [file pcx191_pcp-2017-e-00441-file004.pdf]

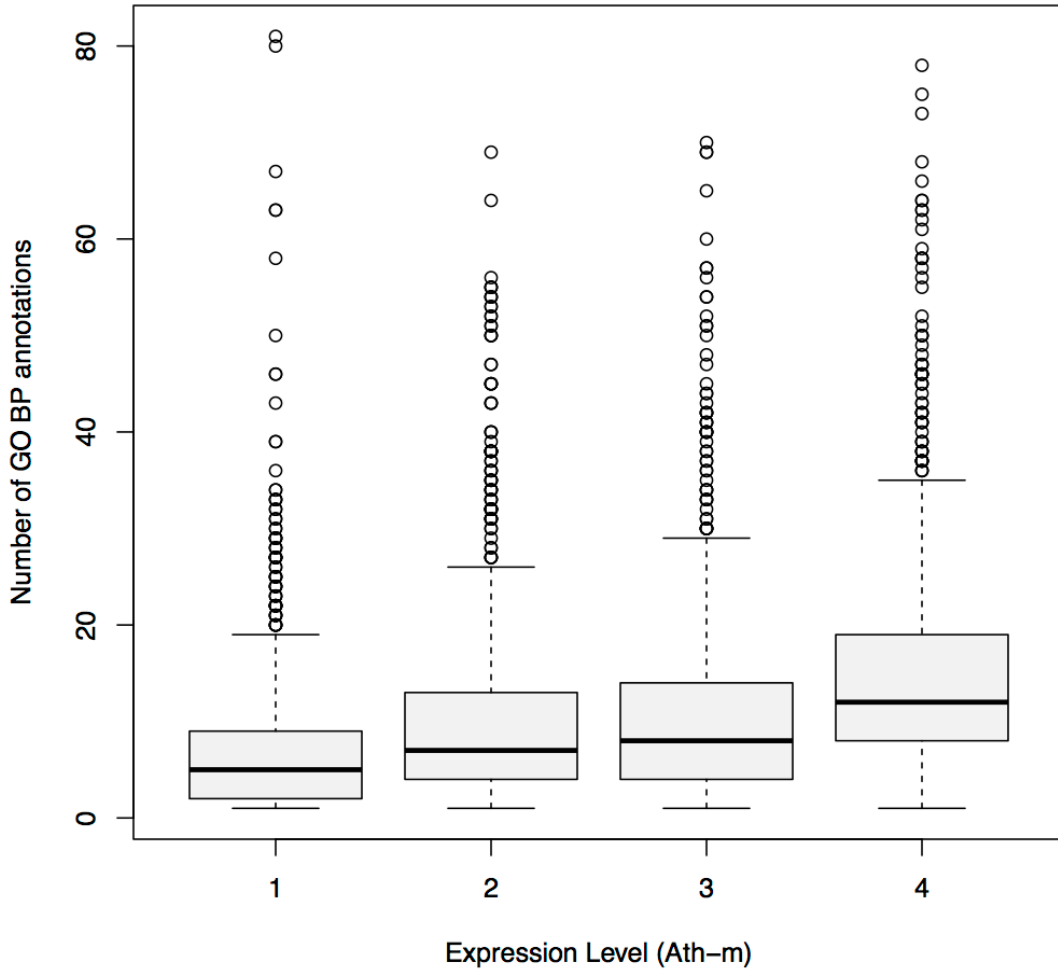

**Supplementary Figure 1.**

Number of annotations of Gene Ontology Biological Process for each gene depends on the expression level. Arabidopsis genes having at least one Gene Ontology Biological Process terms were divided into 4 levels according to its average expression level on Ath-m. The level 1 is the lowest quarter, while the level 4 is the highest quarter.

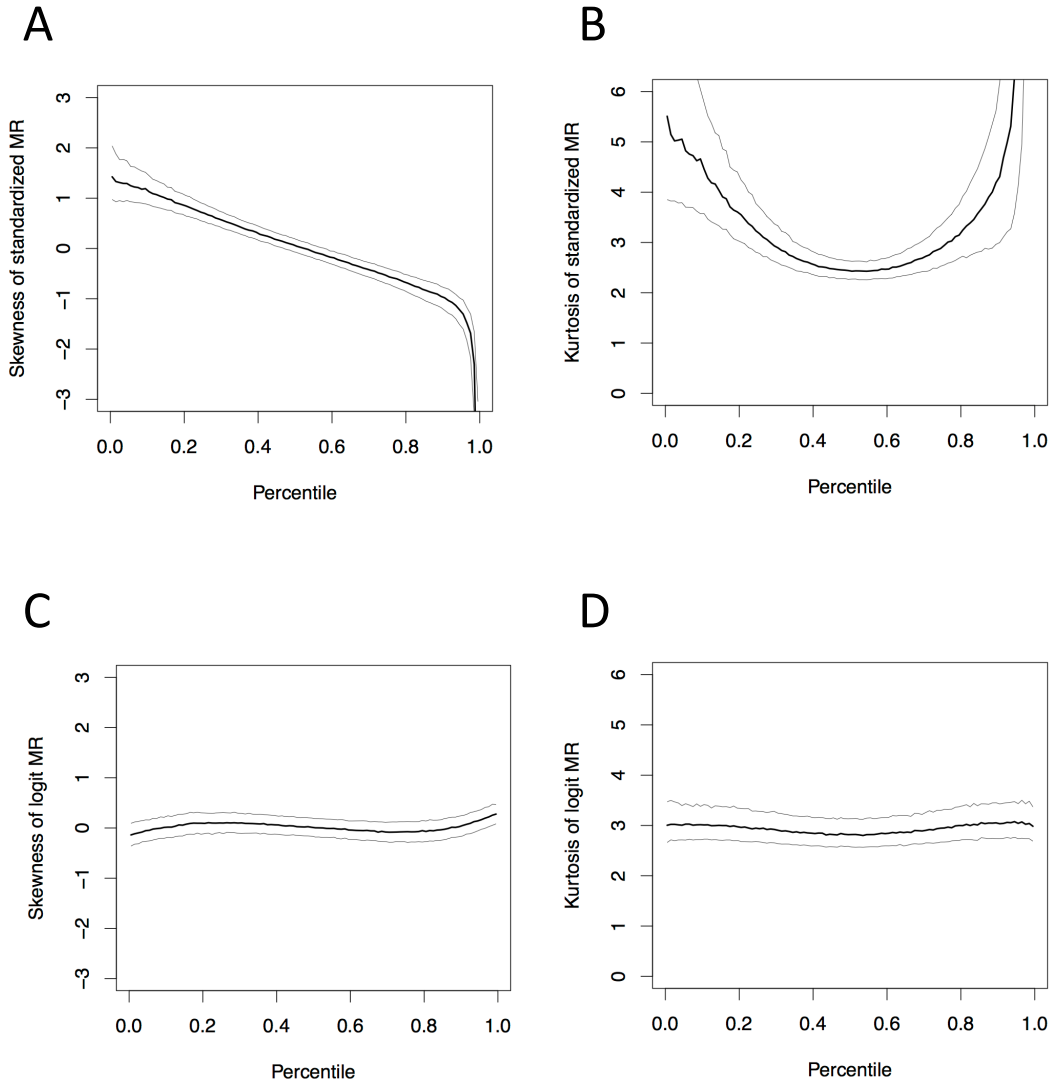

### Supplementary Figure 2.

Properties of error distributions of MR and logit-MR values. The error distribution of MR values in RNAseq-based Arabidopsis coexpression data (Ath-r.c3-0) is shown using a bootstrapping approach. The skewness (A,B), and kurtosis (C,D) of bootstrapped MR values (A,C) or logit-MR values (B,D) are shown versus the mean of the bootstrapped MR values. The black lines show the median values with a sliding window corresponding to the 0.01 percentile of the MR without overlap, whereas the gray lines represent the first and third quantiles.
